# Supplementary material for: Ipl1/Aurora Kinase Suppresses S-CDK-Driven Spindle Formation during Prophase I to Ensure Chromosome Integrity during Meiosis
Source: PubMed Central journal article supplement (PMC3873974; doi:10.1371/journal.pone.0083982), 2013-12-27
Supplement: pone.0083982.s001.pdf [file pone.0083982.s001.pdf]

| Diploid no. | Strain no. | Genotype                                                                                  | MAT |
|-------------|------------|-------------------------------------------------------------------------------------------|-----|
| Y940        | Y885       | Wild type                                                                                 | a   |
|             | Y886       | Wild type                                                                                 | α   |
| Y1206       | Y1192      | <i>pCLB2-3HA-IPL1 (KANMX6)</i>                                                            | a   |
|             | Y1193      | <i>pCLB2-3HA-IPL1 (KANMX6)</i>                                                            | α   |
| Y2241       | Y2185      | <i>ndt80::HYG, ER-GAL4::URA3</i>                                                          | a   |
|             | Y2186      | <i>ndt80::HYG, ER-GAL4::URA3</i>                                                          | α   |
| Y2266       | Y2254      | <i>dmc1::HYG</i>                                                                          | a   |
|             | Y2255      | <i>dmc1::HYG</i>                                                                          | α   |
| Y2404       | Y2236      | <i>rec8::KANMX4</i>                                                                       | a   |
|             | Y2237      | <i>rec8::KANMX4</i>                                                                       | α   |
| Y2457       | Y2422      | <i>pCLB2-3HA-IPL1 (KANMX6) rec8::KANMX4</i>                                               | a   |
|             | Y2423      | <i>pCLB2-3HA-IPL1 (KANMX6) rec8::KANMX4</i>                                               | α   |
| Y2489       | Y2474      | <i>hop2::KANMX4</i>                                                                       | a   |
|             | Y2475      | <i>hop2::KANMX4</i>                                                                       | α   |
| Y2491       | Y2478      | <i>pCLB2-3HA-IPL1 (KANMX6) hop2::KANMX4</i>                                               | a   |
|             | Y2479      | <i>pCLB2-3HA-IPL1 (KANMX6) hop2::KANMX4</i>                                               | α   |
| Y2575       | Y2541      | <i>pCLB2-3HA-IPL1 (KANMX6) ndt80::HYG</i>                                                 | a   |
|             | Y2542      | <i>pCLB2-3HA-IPL1 (KANMX6) ndt80::HYG</i>                                                 | α   |
| Y2656       | Y2610      | <i>pCLB2-3HA-NDD1 (KANMX6), Estrogen Receptor-GAL4TF (URA3), proGAL1-NDT80 (TRP1)</i>     | a   |
|             | Y2645      | <i>pCLB2-3HA-NDD1 (KANMX6), Estrogen Receptor-GAL4TF (URA3), proGAL1-NDT80 (TRP1)</i>     | α   |
| Y2572       | Y2597      | <i>REC8-GFP-URA3, PDS1-tdTomato-KITRP1, CNM67-3mCherry-NATMX4</i>                         | α   |
|             | Y2598      | <i>REC8-GFP-URA3, PDS1-tdTomato-KITRP1, CNM67-3mCherry-NATMX4</i>                         | a   |
| Y2577       | Y2545      | <i>pCLB2-3HA-IPL1 (KANMX6), cdc28-as1, ndt80::HYG</i>                                     | a   |
|             | Y2546      | <i>pCLB2-3HA-IPL1 (KANMX6), cdc28-as1, ndt80::HYG</i>                                     | α   |
| Y2852       | Y2814      | <i>SMC5-13MYC (KANMX6), pCLB2-3HA-TOP1 (KANMX6)</i>                                       | a   |
|             | Y2815      | <i>SMC5-13MYC (KANMX6), pCLB2-3HA-TOP1 (KANMX6)</i>                                       | α   |
| Y3606       | Y3604      | <i>Htb1-mcherry-NATMX4, PDS1-tdTomato-KITRP1, his3::HIS3p-GFP-TUB1-HIS3</i>               | a   |
|             | Y3605      | <i>Htb1-mcherry-NATMX4, PDS1-tdTomato-KITRP1, his3::HIS3p-GFP-TUB1-HIS3</i>               | α   |
| Y4044       | Y4042      | <i>ZIP1:700:GFP, PDS1-tdTomato-KITRP1, CNM67-3mCherry-NATMX4</i>                          | a   |
|             | Y4043      | <i>ZIP1:700:GFP, PDS1-tdTomato-KITRP1, CNM67-3mCherry-NATMX4</i>                          | α   |
| Y4047       | Y4045      | <i>ZIP1:700:GFP, PDS1-tdTomato-KITRP1, CNM67-3mCherry-NATMX4, pCLB2-3HA-IPL1 (KANMX6)</i> | a   |
|             | Y4046      | <i>ZIP1:700:GFP, PDS1-tdTomato-KITRP1, CNM67-3mCherry-NATMX4, pCLB2-3HA-IPL1 (KANMX6)</i> | α   |
| Y4301       | Y4299      | <i>DMC1::HYG, Htb1-mcherry-NATMX4, PDS1-tdTomato-KITRP1, his3::HIS3p-GFP-TUB1-HIS3</i>    | a   |
|             | Y4300      | <i>DMC1::HYG, Htb1-mcherry-NATMX4, PDS1-tdTomato-KITRP1, his3::HIS3p-GFP-TUB1-HIS3</i>    | α   |

| Diploid no. | Strain no. | Genotype                                                                                                           | MAT |
|-------------|------------|--------------------------------------------------------------------------------------------------------------------|-----|
| Y4304       | Y4302      | <i>pCLB2-3HA-IPL1 (KANMX6), DMC1::HYG, Htb1-mcherry-NATMX4, PDS1-tdTomato-KITRP1, his3::HIS3p-GFP-TUB1-HIS3</i>    | a   |
|             | Y4303      | <i>pCLB2-3HA-IPL1 (KANMX6), DMC1::HYG, Htb1-mcherry-NATMX4, PDS1-tdTomato-KITRP1, his3::HIS3p-GFP-TUB1-HIS3</i>    | α   |
| Y4398       | Y4396      | <i>pCLB2-3HA-CDC5 (KANMX6), pCLB2-3HA-IPL1 (KANMX6), dmc1::HYG, Htb1-mcherry-NATMX4, his3::HIS3p-GFP-TUB1-HIS3</i> | a   |
|             | Y4397      | <i>pCLB2-3HA-CDC5 (KANMX6), pCLB2-3HA-IPL1 (KANMX6), dmc1::HYG, Htb1-mcherry-NATMX4, his3::HIS3p-GFP-TUB1-HIS3</i> | α   |
| Y4406       | Y4404      | <i>pCLB2-CDC5::kanMX6, dmc1::HYG, Htb1-mcherry-NATMX4, PDS1-tdTomato-KITRP1, his3::HIS3p-GFP-TUB1-HIS3</i>         | a   |
|             | Y4405      | <i>pCLB2-CDC5::kanMX6, dmc1::HYG, Htb1-mcherry-NATMX4, PDS1-tdTomato-KITRP1, his3::HIS3p-GFP-TUB1-HIS3</i>         | α   |
| Y4489       | Y2308      | <i>CLB1-9MYC (TRP1)</i>                                                                                            | a   |
|             | Y2309      | <i>CLB1-9MYC (TRP1)</i>                                                                                            | α   |
| Y4490       | Y1389      | <i>CLB3-13MYC (HIS3MX6)</i>                                                                                        | a   |
|             | Y1423      | <i>CLB3-13MYC (HIS3MX6)</i>                                                                                        | α   |
| Y4491       | Y2555      | <i>dmc1::HYG (HPH), CLB1-9MYC (TRP1)</i>                                                                           | a   |
|             | Y2556      | <i>dmc1::HYG (HPH), CLB1-9MYC (TRP1)</i>                                                                           | α   |
| Y4492       | Y2559      | <i>dmc1::HYG (HPH), CLB3-13MYC (HIS3MX6)</i>                                                                       | a   |
|             | Y2560      | <i>dmc1::HYG (HPH), CLB3-13MYC (HIS3MX6)</i>                                                                       | α   |
| Y4493       | Y2557      | <i>pCLB2-3HA-IPL1 (KANMX6), dmc1::HYG (HPH), CLB1-9MYC (TRP1)</i>                                                  | a   |
|             | Y2558      | <i>pCLB2-3HA-IPL1 (KANMX6), dmc1::HYG (HPH), CLB1-9MYC (TRP1)</i>                                                  | α   |
| Y4494       | Y2561      | <i>pCLB2-3HA-IPL1 (KANMX6), dmc1::HYG (HPH), CLB3-13MYC (HIS3MX6)</i>                                              | a   |
|             | Y2562      | <i>pCLB2-3HA-IPL1 (KANMX6), dmc1::HYG (HPH), CLB3-13MYC (HIS3MX6)</i>                                              | α   |
| Y4495       | Y2258      | <i>pCLB2-3HA-IPL1 (KANMX6), dmc1::HYG (HPH)</i>                                                                    | a   |
|             | Y2259      | <i>pCLB2-3HA-IPL1 (KANMX6), dmc1::HYG (HPH)</i>                                                                    | α   |
| Y4496       | Y4452      | <i>clb1-clb6::KANmx6, clb3::natmx4, clb4::HPHmx4, pCLB2-3HA-IPL1 (KANMX6), DMC1::HYG</i>                           | a   |
|             | Y4454      | <i>clb1-clb6::KANmx6, clb3::natmx4, clb4::HPHmx4, pCLB2-3HA-IPL1 (KANMX6), DMC1::HYG</i>                           | α   |
| Y4499       | Y4497      | <i>pCLB2-3HA-IPL1 (KANMX6), ndt80::HYG, pCLB2-3HA-NDD1 (KANMX6)</i>                                                | a   |
|             | Y4498      | <i>pCLB2-3HA-IPL1 (KANMX6), ndt80::HYG, pCLB2-3HA-NDD1 (KANMX6)</i>                                                | α   |

all strains are SK1 isogenic for *his3::hisG, leu2::hisG, trp1::hisG, lys2, ura3, ho::LYS2*
